# Supplementary material
Source: PubMed Central journal article supplement (PMC3375975)
Supplement: supp_pp.112.194878_194878PKL_targeting_supplemental.pdf [file supp_pp.112.194878_194878PKL_targeting_supplemental.pdf]

## Supplementary Materials and Methods

### Plasmid construction

Epitope tagged versions of PKL were both generated from a PKL expression construct in which PKL cDNA is flanked by the genomic sequences that flank PKL and which has previously been shown to rescue *pkl*-associated phenotypes (Li et al., 2005). In pJO981 (Li et al., 2005), the termination codon of the PKL cDNA is flanked by *ClaI* and *SphI* sites. A vector containing 6 copies of c-Myc (6xc-Myc) from ABRC (stock number CD3-128) was modified with linkers such that the 6xc-Myc fragment was flanked by *ClaI* and *SphI*, which was then cloned into pJO981 to generate the *PKL-c-Myc* construct pJO984. Similarly, an adaptor cassette was designed containing 3 copies of FLAG flanked by *ClaI* and *SphI* and was then cloned into pJO981 to generate the *PKL-FLAG* construct pJO1048.

### ChIP protocol

Tissue was immersed in 0.1% Triton X-100 with 1% formaldehyde under house vacuum. After 10 min 1/15 volume of 2 M glycine was added and the tissue kept under vacuum for another 5 min. The tissue was washed and either flash-frozen in liquid nitrogen or ground fresh. If the tissue was flash frozen, it was then ground into fine powder and resuspended in 20 ml of cold Extraction Buffer 1 (0.4 M sucrose, 10 mM Tris•Cl pH 8.0, 10 mM MgCl<sub>2</sub>) with protease inhibitors (1x protease inhibitor cocktail (Sigma P9599)). The following steps were performed at 4°C or on ice unless otherwise indicated. The lysate was filtered through one layer of miracloth (Calbiochem 475855) and centrifuged at 3,000x g for 20 min. The pellet was resuspended in 1.5 ml of Extraction Buffer 2 (0.25 M sucrose, 10 mM Tris•Cl pH8.0, 10 mM MgCl<sub>2</sub>, 1% Triton X-100) with protease inhibitors and centrifuged at 12,000x g for 10 min. Each pellet was resuspended in another 1 mL of extraction buffer 2 with protease inhibitors and centrifuged at 12,000x g. Each pellet was then resuspended in 600 µl of Extraction Buffer 3 (1.7 M sucrose, 10 mM Tris•Cl pH8.0, 2 mM MgCl<sub>2</sub>, 0.15% Triton X-100) with protease inhibitors, layered on top of 600 µl of EB3 and centrifuged (16,000x g, 1 hour). Pellet from each tube was resuspended in 750 µl of HEPES buffer (50 mM Hepes•KOH pH7.5, 140 mM NaCl, 1% Triton X-100, 0.1% sodium deoxycholate, 1mM EDTA) with protease inhibitors and the chromatin was sheared into ~250-750 bp fragments by sonication. The tubes were then centrifuged (16,000x g, 10 min) and the supernatant was transferred to a new tube. ~200 µl of the supernatant was used for each immunoprecipitation reaction. Before adding the antibody, the reaction was precleared by adding 20 µl of Dynabeads Protein G (Invitrogen, 100.04D; equilibrated with HEPES buffer, 50%

slurry) and rocked at 4°C for 1 hour. Appropriate antibodies (anti-H3, Abcam ab1791; anti-H3K27me3, Millipore 07-449; anti-Flag M2, Sigma F1804, anti-Myc, Millipore 05-724) were added at 1:100 dilution and the tubes were rotated at 4°C for ~15 hours. Then 20 µl of Dynabeads Protein G (Invitrogen, 100.04D; equilibrated with HEPES buffer, 50% slurry) was added to each tube and the incubation continued for another 1 hour. The beads were washed sequentially with 1 ml of each of the following: HEPES buffer (50 mM Hepes•KOH pH7.5, 140 mM NaCl, 1% Triton X-100, 0.1% sodium deoxycholate, 1mM EDTA), HEPES HS (as HEPES buffer, but with 500 mM NaCl), LNDET (0.25 M LiCl, 0.5% NP40, 0.5% sodium deoxycholate, 1 mM EDTA, 10 mM Tris•Cl pH8.0), and TE (10 mM Tris•Cl pH8.0, 1 mM EDTA). The immunocomplexes were eluted using 300ul of 10% (w/v) Chelex 100 (Biorad, 142-1253). After addition of Chelex 100, the tubes were incubated at 100°C for 15 minutes. The samples were cooled at room temperature then treated with proteinase K for 1 hour at 42°C. Incubating the tubes at 75°C for 10 minutes inactivated the Proteinase K. The tubes were then spun at 12,000x g for 1 minute and the supernatant removed to a new tube. 4 µl of each sample was used in each qPCR reaction.

## REFERENCES

- Charron JB, He H, Elling AA, Deng XW** (2009) Dynamic landscapes of four histone modifications during deetiolation in Arabidopsis. *Plant Cell* **21**: 3732-3748
- Li HC, Chuang K, Henderson JT, Rider SD, Jr., Bai Y, Zhang H, Fountain M, Gerber J, Ogas J** (2005) PICKLE acts during germination to repress expression of embryonic traits. *Plant J* **44**: 1010-1022
- Tian L, Fong MP, Wang JJ, Wei NE, Jiang H, Doerge RW, Chen ZJ** (2005) Reversible histone acetylation and deacetylation mediate genome-wide, promoter-dependent and locus-specific changes in gene expression during plant development. *Genetics* **169**: 337-345
- Turck F, Roudier F, Farrona S, Martin-Magniette ML, Guillaume E, Buisine N, Gagnot S, Martienssen RA, Coupland G, Colot V** (2007) Arabidopsis TFL2/LHP1 specifically associates with genes marked by trimethylation of histone H3 lysine 27. *PLoS Genet* **3**: e86
- Vlachonasios KE, Thomashow MF, Triezenberg SJ** (2003) Disruption mutations of ADA2b and GCN5 transcriptional adaptor genes dramatically affect Arabidopsis growth, development, and gene expression. *Plant Cell* **15**: 626-638

**Zhang X, Yazaki J, Sundaresan A, Cokus S, Chan SW, Chen H, Henderson IR, Shinn P, Pellegrini M, Jacobsen SE, Ecker JR** (2006) Genome-wide high-resolution mapping and functional analysis of DNA methylation in arabidopsis. *Cell* **126**: 1189-1201

**Zilberman D, Gehring M, Tran RK, Ballinger T, Henikoff S** (2007) Genome-wide analysis of *Arabidopsis thaliana* DNA methylation uncovers an interdependence between methylation and transcription. *Nat Genet* **39**: 61-69

Figure S1

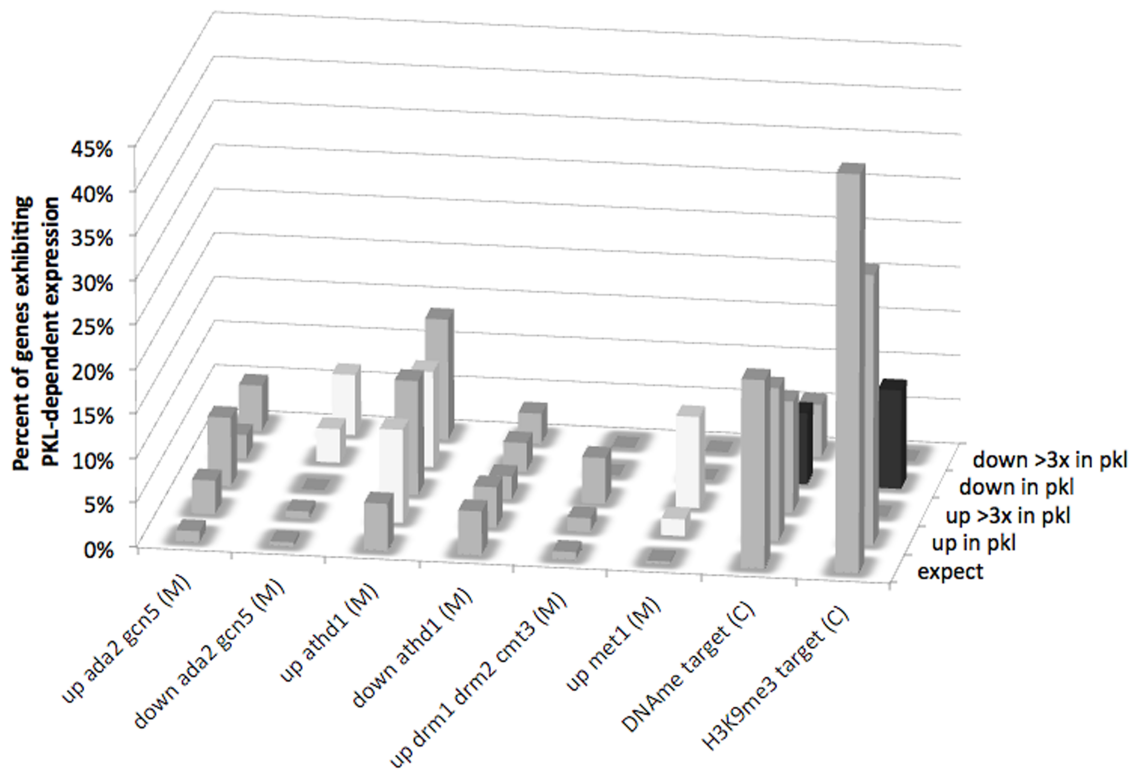

**Figure S1.** Analysis of the intersection of *PKL*-dependent genes in 14-day-old plants with other epigenomic data sets is consistent with the hypothesis that *PKL* does not function in the plant equivalent of a Mi-2/NuRD complex. A, Fisher's exact test (see "Materials and Methods") was used to examine the intersection of genes linked to an epigenetic pathway (*x*-axis) and genes that exhibit altered expression in response to *pkl* according to various selection criteria (*y*-axis). The percent of genes that exhibit altered expression in *pkl* plants that fall within each intersection is represented on the *z*-axis. The *expect* category on the *y*-axis indicates the percentage of *PKL*-dependent genes expected to found in the intersection of the compared sets of genes. A *white bar* denotes more genes observed in common between the two sets than expected (at  $p < 1 \times 10^{-3}$ ), whereas a *dark bar* denotes fewer genes observed than expected (at  $p < 1 \times 10^{-3}$ ). In *x*-axis categories, *C* denotes ChIP-chip data, and *M* denotes microarray-derived expression data. Microarray analyses in *ada2 gcn5* plants (Vlachonasios et al., 2003) and *athd1* plants (Tian et al., 2005) examine the effect of impaired histone deacetylases on the transcriptome. Microarray analyses in *drm1 drm2 cmt3* plants and *met1* plants examine the effect of impaired cytosine methyltransferases on the transcriptome (Zhang et al., 2006). DNAme refers to genes identified

as enriched for DNA methylation by ChIP-chip analysis (Zilberman et al., 2007). H3K9me3 refers to genes identified as enriched for H3K9me3 by ChIP-chip analysis (Turck et al., 2007).

Figure S2

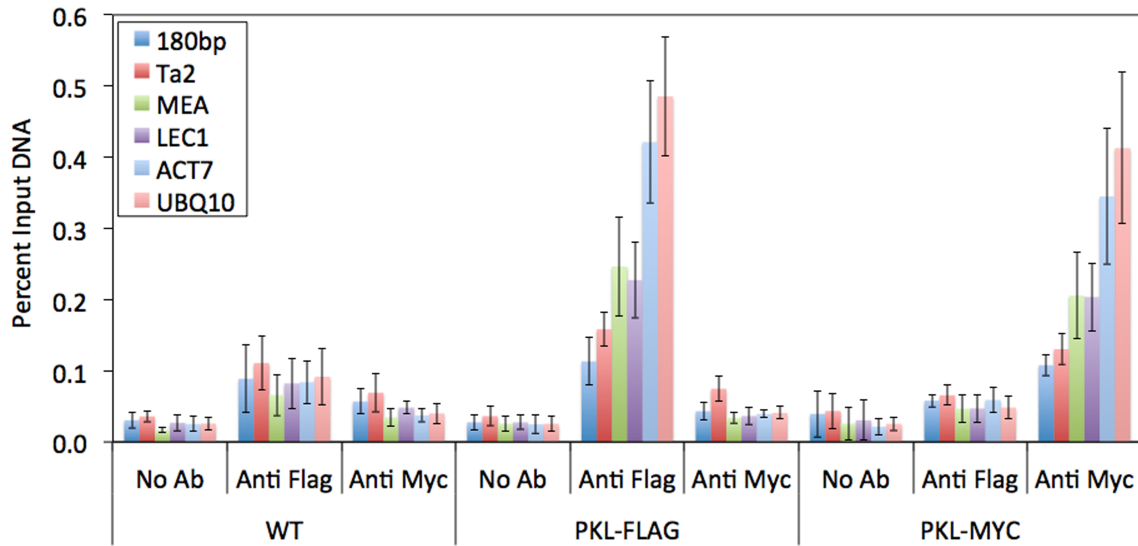

**Figure S2.** ChIP using *PKL-FLAG* plants reproduce data obtained from *PKL-c-Myc* plants. ChIP was used to examine recruitment of PKL in 5-day-old plants. ChIP was carried out using no antibody (No Ab), anti-FLAG (Anti Flag), or anti-c-MYC (Anti Myc) using cross-linked DNA from wild-type (WT), *PKL-FLAG* (PKL-FLAG), and *PKL-c-Myc* (PKL-MYC) plants and the indicated loci were examined. The y-axis denotes percent of input DNA brought down for a given immunoprecipitation. All data are the average of four biological replicates. Error bars denote standard deviation.
